# Supplementary material for: Distribution and Flux of Dissolved Iron of the Rajang and Blackwater Rivers at Sarawak, Borneo
Source: Copernicus journal article supplement (doi:10.5194/bg-2019-204), 2019-06-18
Supplement: Supplementary file 1 [file bg-2019-204-supplement.pdf]

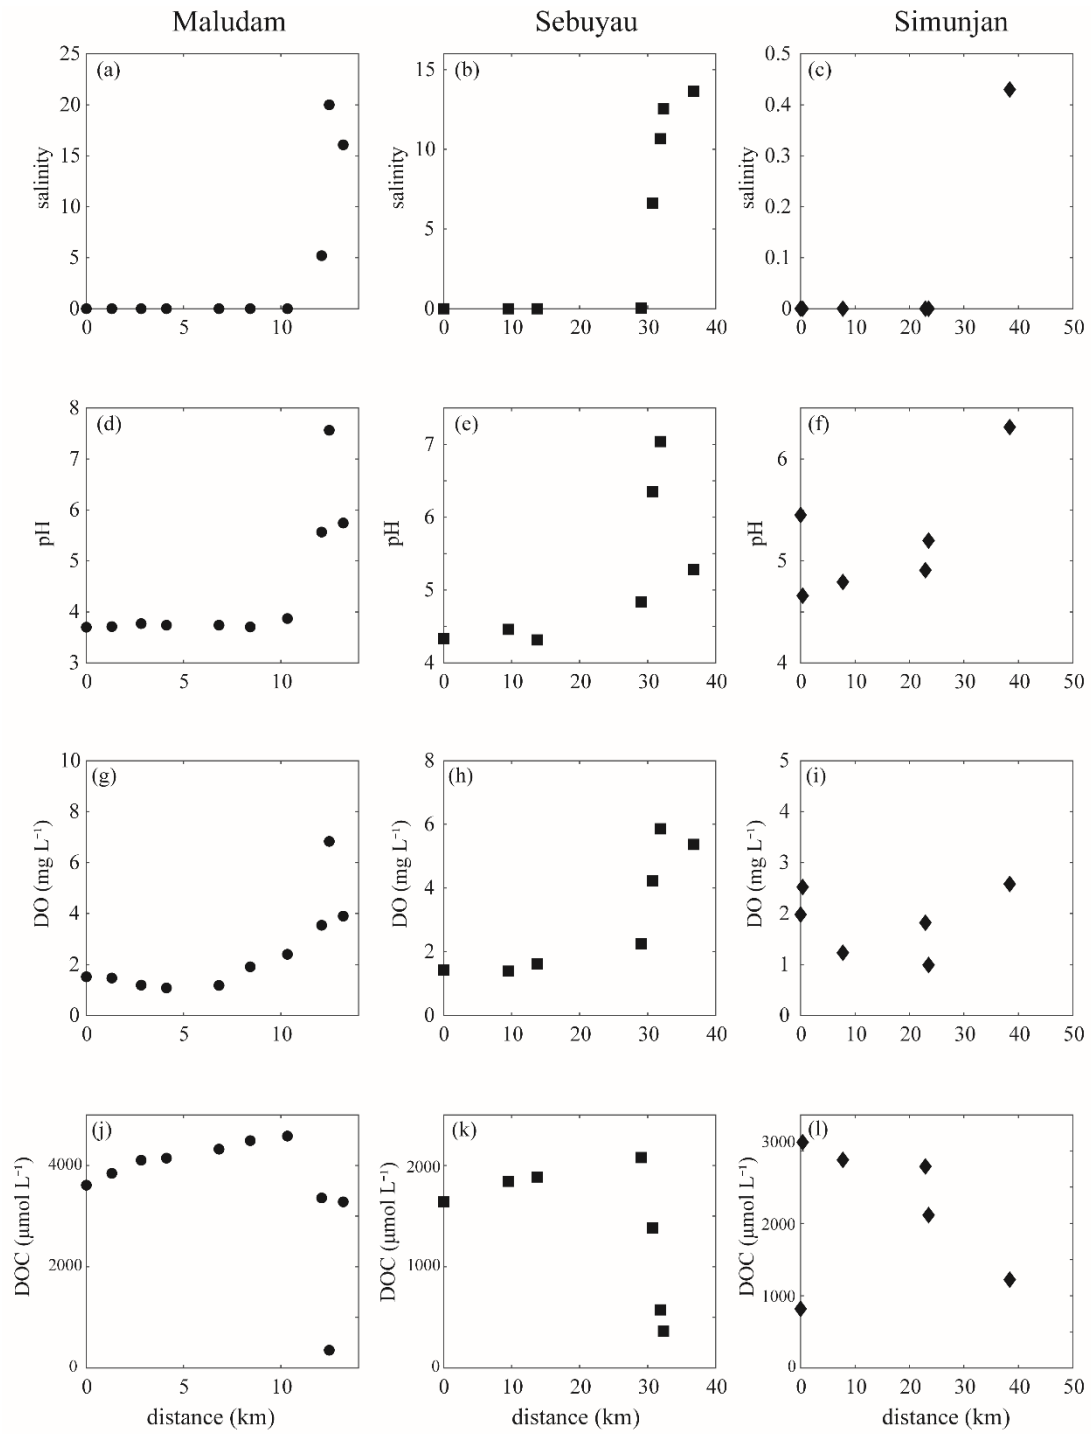

Supplement: The correlation of the distance with salinity (a-c), pH (d-f), dissolved oxygen (DO) (g-i), and dissolved organic carbon (DOC) (j-l) in blackwater rivers including Maludam, Sebuyau, and Simunjan. We adopted the station at the upper stream as distance=0, and the downstream direction as positive.
