# Supplementary material for: Distribution and Flux of Dissolved Iron of the Rajang and Blackwater Rivers at Sarawak, Borneo
Source: Copernicus journal article supplement (doi:10.5194/bg-2019-204), 2019-06-18
Supplement: Supplementary file [file bg-2019-204-RC1-supplement.pdf]

This article has discussed the distribution and flux of dissolved iron of the Rajang and Blackwater Rivers at Sarawak, Borneo. The idea of the article is clear and the analysis is thorough. The following points should be issued:

1. In Section 2.3, two methods for determination of DOC were mentioned. Though these two methods are all acceptable, but I think it is better to use the same method in one work for comparison.
2. Did the authors consider the effect of temperature on dFe?
3. In Section 4.1, there were not only seasonal variation analysis but also spatial analysis. In order to summary the corresponding analysis content more accurate and keep pace with the following several sections, I think it is better to entitle Section 4.1 as “dFe in the Rajang freshwater”.
4. In Page 8, Line 201-202, “In the Rajang Estuary, the concentration of dFe ranged from 1.7 nmol L<sup>-1</sup> to 7.0 μmol L<sup>-1</sup> (mean: 1.1 ± 2.2 μmol L<sup>-1</sup>)”, Is it correct?
5. As shown in Table 1, the standard deviations for SPM and DOC are rather large. Is it due to the different samples?
6. One or more relative references about “the stronger weathering derived from intensive precipitations” should be added to make the statement of “Considering the limited temperature variation in the

tropical zone, the dFe elevation may be related to the stronger weathering derived from intensive precipitations. (Page 9, Line 230-232)” more convincing (needing literature support).

7. Check the manuscript carefully. There are several language errors in this paper, for example “supporting” in Page 3 Line 42 and “carring” in Page 9 Line 233. CO<sub>2</sub>(In Page 21,Line 569) should be changed to CO<sub>2</sub>.

Reviewer: Dawei Pan

Yantai Institute of Coastal Zone Research, CAS

Sep 7<sup>th</sup>, 2019
